# Supplementary material for: Efficient capture of Sr2+ from acidic aqueous solution by an 18-crown-6-ether-based metal organic framework
Source: Royal Society of Chemistry journal article supplement (doi:10.1039/d1ce00229e), 2021-01-01
Supplement: d1ce00229e1.pdf [file d1ce00229e1.pdf]

## Supplementary Information

### Efficient Capture of Sr<sup>2+</sup> from Acidic Aqueous Solution by an 18-

### Crown-6-Ether based Metal Organic Framework

Chenglong Guo,<sup>ab</sup> Mengjia Yuan,<sup>b</sup> Linwei He,<sup>b</sup> Liwei Chen,<sup>b</sup> Xia Wang,<sup>b</sup> Nannan Shen,<sup>b</sup> Fuyin Ma,<sup>\*b</sup> Guolin Huang,<sup>\*a</sup> Shuao Wang<sup>\*b</sup>

a. *State Key Laboratory of Nuclear Resources and Environment, East China University of Technology, Nanchang 330013, China. E-mail: guolinhuang@sina.com.*

b. *State Key Laboratory of Radiation Medicine and Protection, School for Radiological and interdisciplinary Sciences (RAD-X) and Collaborative Innovation Center of Radiation Medicine of Jiangsu Higher Education Institutions, Soochow University, Suzhou 215123, China. E-mail: mafuyin@suda.edu.cn; shuaowang@suda.edu.cn*

## Section 1. Synthesis

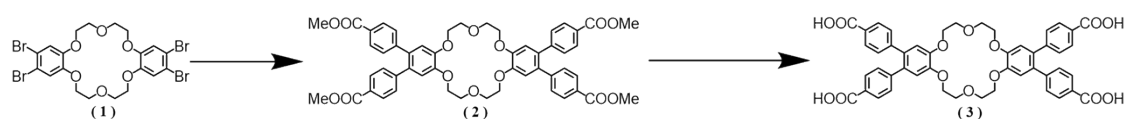

Scheme. 1 Synthetic routes to the ligand compound 3.

### 2.1.1 Synthesis of 4,4',5,5'-tetrabenzoate dibenzo-18-crown-6 (2)

4,4',5,5'-tetrabromodibenzo-18-crown-6 (1.0425 g, 1.54 mmol), methyl 4-(4,4,5,5-tetramethyl-1,3,2-dioxaborolan-2-yl)benzoate (2.452 g, 9.35 mmol),  $K_2CO_3$  (1.017 g, 7.36 mmol), and tetrakis(triphenylphosphine) palladium (0.202 g, 0.175 mmol) were added into a 100 mL Schleck flask. The flask was pumped under vacuum and refilled with  $N_2$  three times, and then the degassed solvent of THF/ $CH_3OH$  (30 mL/ 5 mL) were transferred into the Schleck flask. The mixture solution was heated at 90 °C for 48 h under a nitrogen atmosphere. After that the reaction mixture was cooled to room temperature, it was filtered and concentrated. The aqueous layer was extracted with chloroform (3×50 mL), and then the combined organic layer was dried over anhydrous  $MgSO_4$ . Hereafter, the solution was filtered and concentrated by a rotary evaporator. Finally, the crude product was recrystallized with ethyl acetate and chloroform to obtain a white solid. Yield: 0.8655 g (62.6%).  $^1H$  NMR (400 MHz, Chloroform- $d$ )  $\delta$  7.86 (d,  $J = 8.1$  Hz, 8H), 7.14 (d,  $J = 8.1$  Hz, 8H), 6.93 (s, 4H), 4.27 (t,  $J = 4.4$  Hz, 8H), 4.07 (t,  $J = 4.5$  Hz, 8H), 3.89 (s, 12H).

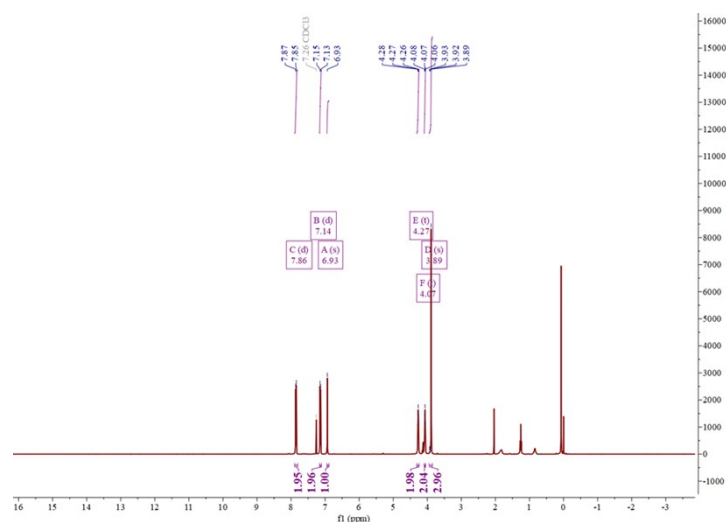

Fig. S1  $^1H$  NMR spectra of compound 2 in  $CDCl_3$ .

### 2.1.2 Synthesis of 4,4',5,5'-terabenzoic acid dibenzo-18-crown-6 ( $H_4TBADB-18Cr6$ ) (3)

The compound 2 (0.8002, 0.966 mmol) was dissolved in 30 mL of  $CH_3OH$ , and 10 mL of 6 M NaOH aqueous solution was added. The mixture was stirred under reflux for 24 h. After cooling to room temperature, it was concentrated under vacuo to remove methanol, and then acidified by adding 3 M HCl solution dropwise to the above clear solution and adjusted to pH=1. Finally, a white precipitate was obtained, which was filtered, washed with water, and dried in an oven at 80 °C for 12 h. Yield: 0.6685 g (88.9%).  $^1H$  NMR (400 MHz,  $DMSO-d_6$ )  $\delta$  7.77 (d,  $J = 8.1$  Hz, 8H), 7.21 (d,  $J = 8.1$  Hz, 8H), 7.03 (s, 4H), 4.22 (d,  $J = 5.6$  Hz, 8H), 3.87 (d,  $J = 7.3$  Hz, 8H).  $^{13}C$  NMR (101 MHz,  $DMSO$ )  $\delta$  167.17, 147.77, 145.23, 131.38, 129.95, 129.03, 128.81, 114.49, 68.82, 67.91.

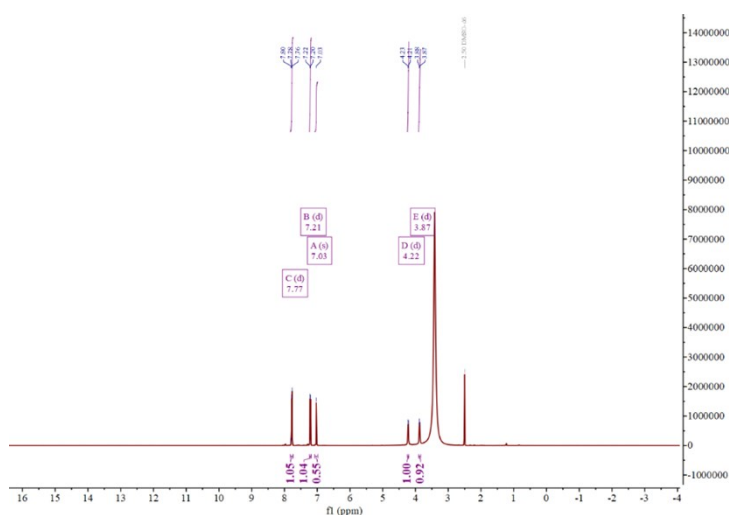

Fig. S2  $^1H$  NMR spectra of compound 3 in  $[D_6]DMSO$

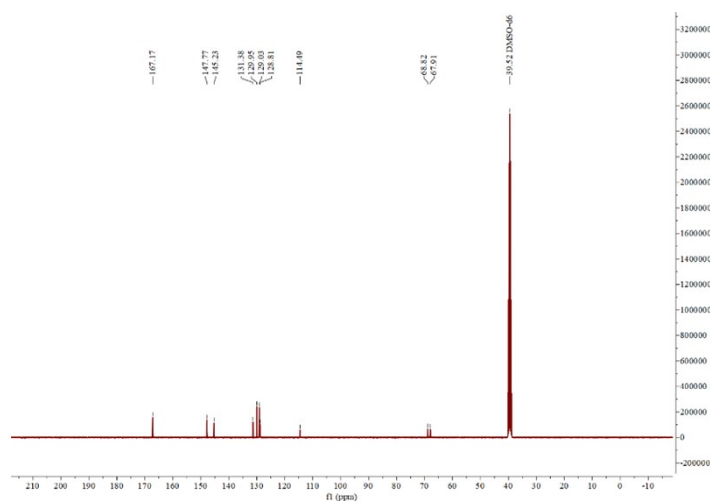

Fig. S3  $^{13}C$  NMR spectra of compound 3 in  $[D_6]DMSO$ .

## Section 2. Experimental method and characterization

### 2.1 The effect of pH on Sr<sup>2+</sup> adsorption

By studying the solid-to-liquid ratio  $m:V=1 \text{ g L}^{-1}$ , 5 mg of SNU-200 sample was added to 5 mL solution containing  $50 \text{ mg L}^{-1} \text{ Sr}^{2+}$ . When the contact time was 12 h, the adsorption capacity of Sr<sup>2+</sup> in the solution with pH value of 2 to 10. Then, the solid-liquid was separated by the aqueous  $0.22 \mu\text{m}$  nylon membrane, and the concentration in the remaining liquid after adsorption was measured by ICP-OES. Finally, the Sr<sup>2+</sup> adsorption capacities and removal rates were calculated.

### 2.2 Adsorption kinetics

Added 5 mg of SNU-200 sample into a 5 mL aqueous solution of Sr<sup>2+</sup> with pH = 3 and an initial concentration of  $50 \text{ mg L}^{-1}$ . The mixture was stirred for a series of contact times. The adsorption capacities and concentrations of Sr<sup>2+</sup> with different time were obtained. Then, the pseudo first-order and pseudo-second-order kinetic models were used to determine the adsorption kinetic curve. The equations are as follows:

pseudo first-order model:  $\ln(q_e - q_t) = \ln q_e - k_1 t$

pseudo-second-order model:  $\frac{t}{q_t} = \frac{1}{k_2 q_e^2} + \frac{1}{q_e} t$

In the formula,  $q_e$  ( $\text{mg g}^{-1}$ ) is the adsorption capacity of the adsorbent at the completion of the reaction;  $q_t$  ( $\text{mg g}^{-1}$ ) is the adsorption capacity of the adsorbent at any moment;  $k_1$  ( $\text{min}^{-1}$ ) and  $k_2$  ( $\text{g mg}^{-1} \text{ min}^{-1}$ ) are the rate constants of pseudo-first-order and pseudo-second-order kinetic adsorption, respectively.

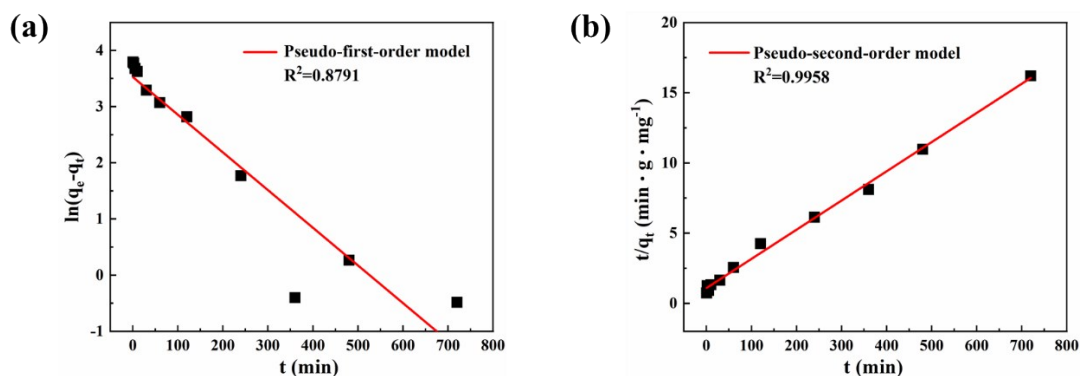

Fig. S4 (a) pseudo-first-order model. (b) pseudo-second-order model.

**Table S1.** pseudo-first-order and pseudo-second-order kinetic model fitting parameters.

| pseudo-first-order         |                             |        | pseudo-second-order                           |                             |        |
|----------------------------|-----------------------------|--------|-----------------------------------------------|-----------------------------|--------|
| $k_1$ (min <sup>-1</sup> ) | $q_e$ (mg g <sup>-1</sup> ) | $R^2$  | $k_2$ (g mg <sup>-1</sup> min <sup>-1</sup> ) | $q_e$ (mg g <sup>-1</sup> ) | $R^2$  |
| 0.00671                    | 34.01                       | 0.8791 | 0.0004                                        | 48.08                       | 0.9958 |

### 2.3 The effect of coexisting ions

The effect of coexisting metal ions represented by Na<sup>+</sup>, K<sup>+</sup>, Mg<sup>2+</sup>, Ca<sup>2+</sup>, and Cs<sup>+</sup> were studied. By studying competing ions from low concentrations to high concentrations, the selective removal effect of SNU-200 for Sr<sup>2+</sup> were obtained. Specifically, the influence of coexisting alkali metal ions represented by Na<sup>+</sup>, K<sup>+</sup> and Cs<sup>+</sup> was studied. 5 mg SNU-200 sample were stirred with 5 mL solution of Sr<sup>2+</sup> at pH = 3 with that the molar ratio of Sr<sup>2+</sup>: Na<sup>+</sup>/K<sup>+</sup> were 1:1, 1:10, 1:100, and 1:1000, respectively. After contacting for 6 h, the concentrations of Sr<sup>2+</sup> in the remaining solutions were tested to obtain the removal rates. In the same way, the effect of adsorption and separation under the coexistence of alkaline-earth metal ions presented by Mg<sup>2+</sup> and Ca<sup>2+</sup> were also studied in the similar way.

### 2.4 Adsorption isotherm experiment

The initial Sr<sup>2+</sup> concentrations were set from 1 to 300 mg L<sup>-1</sup>, and the adsorption isotherm experiment of SNU-200 for Sr<sup>2+</sup> was carried out. In a typical experiment, 5 mg of the adsorbent SNU-200 was added into 5 mL of an aqueous solution containing a certain concentration of Sr<sup>2+</sup> with pH = 3. The above mixture was shaken for 6 h to ensure balance, and then a 0.22 μm water-based nylon membrane was used to filter to separate solid and liquid. The concentrations of Sr<sup>2+</sup> in the filtrate solution were measured by ICP-OES, and the adsorption capacity and distribution coefficient also be calculated. In order to further understand the absorption model of Sr<sup>2+</sup> on SNU-200, the Langmuir and Freundlich isotherm models were calculated, which were expressed as follows:

$$\text{Langmuir model: } \frac{C_e}{q_e} = \frac{C_e}{q_m} + \frac{1}{q_m K_l}$$

$$\text{Freundlich model: } \ln q_e = \ln k_F + \frac{1}{n} \ln C_e$$

Where  $q_m$  (mg g<sup>-1</sup>) is the theoretical maximum adsorption capacity of a single layer,  $C_e$

( $\text{mg L}^{-1}$ ) is the ion concentration at equilibrium,  $q_e$  ( $\text{mg g}^{-1}$ ) is the equilibrium adsorption capacity obtained from the experiment, and  $K_L$  ( $\text{mL mg}^{-1}$ ) is the Langmuir constant.  $K_F$  ( $\text{mg g}^{-1}$ ) and  $n$  are Freundlich constants describing adsorption capacity and adsorption strength, respectively.

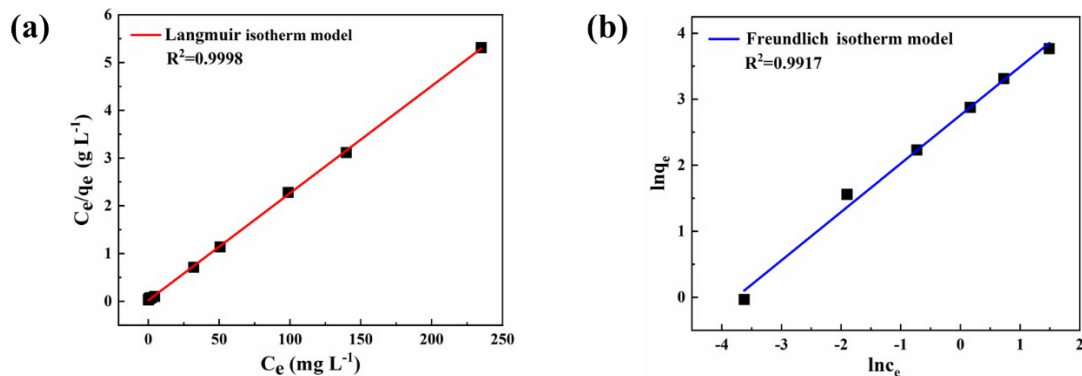

Fig. S5 (a) Langmuir isotherm model. (b) Freundlich isotherm model.

Table. S2 Langmuire and Freundlich isotherm model fitting parameters.

| Langmuir                     |                              |        | Freundlich                                        |      |        |
|------------------------------|------------------------------|--------|---------------------------------------------------|------|--------|
| $q_m$ ( $\text{mg g}^{-1}$ ) | $K_d$ ( $\text{L mg}^{-1}$ ) | $R^2$  | $K_F$ ( $\text{L}^n/\text{mol}^{n-1} \text{ g}$ ) | $n$  | $R^2$  |
| 44.8                         | 1.007                        | 0.9998 | 15.8                                              | 1.36 | 0.9917 |

## 2.5 Characterizations

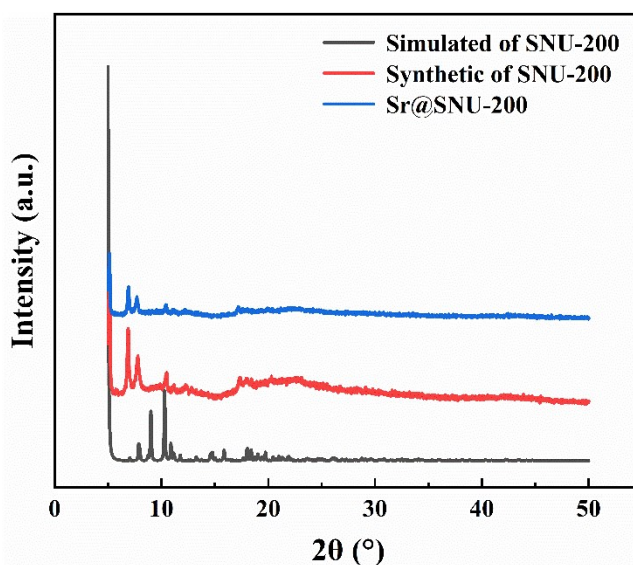

Fig. S6 PXRD patterns of SNU-200 before and after adsorption of  $\text{Sr}^{2+}$ .

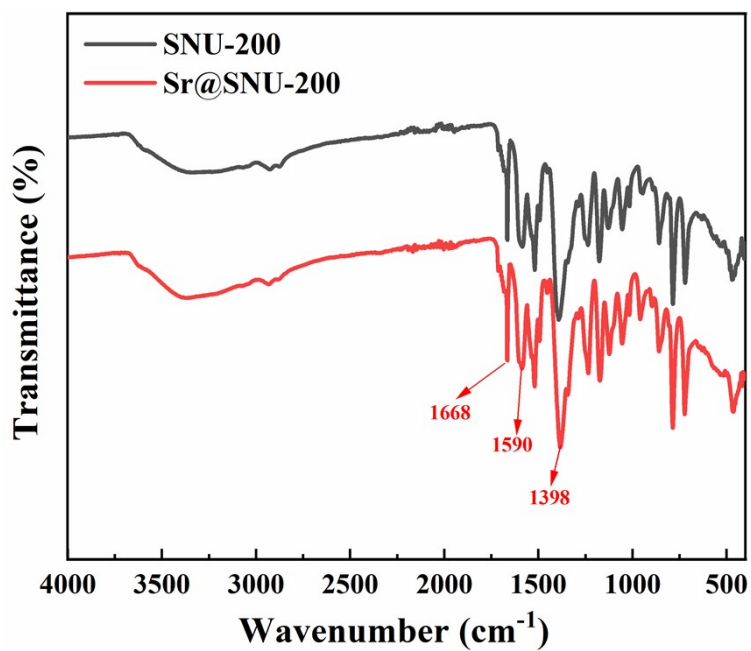

Fig. S7 FT-IR spectra of SNU-200 before and after adsorption of Sr<sup>2+</sup>.

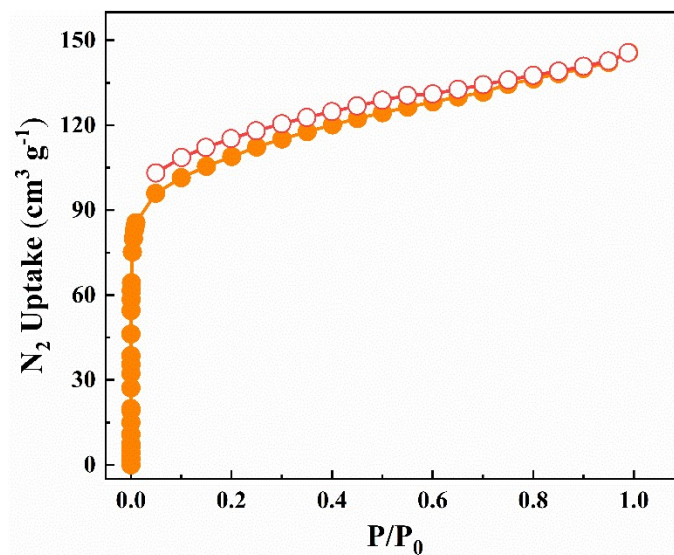

Fig. S8 N<sub>2</sub> sorption isotherms at 77 K of the SNU-200 activated with supercritical CO<sub>2</sub>. Filled shape: adsorption; open shape: desorption.

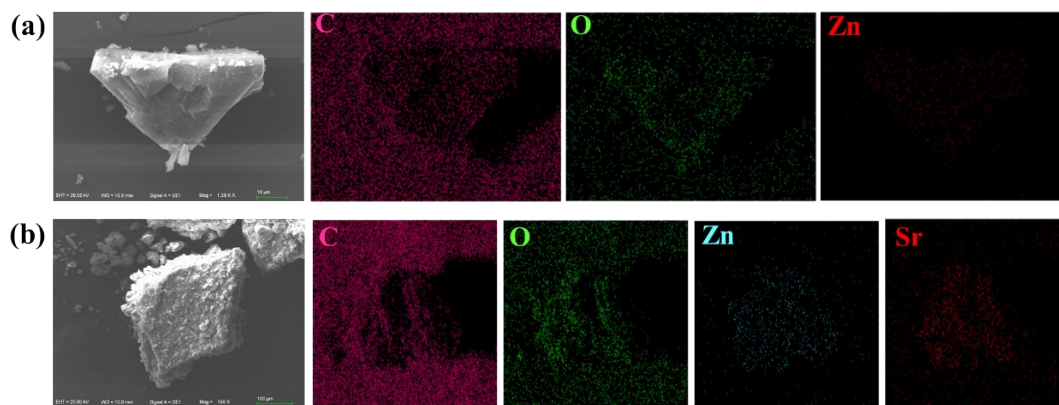

Fig. S9 SEM/EDS spectra of SNU-200 before and after adsorption of Sr<sup>2+</sup>.

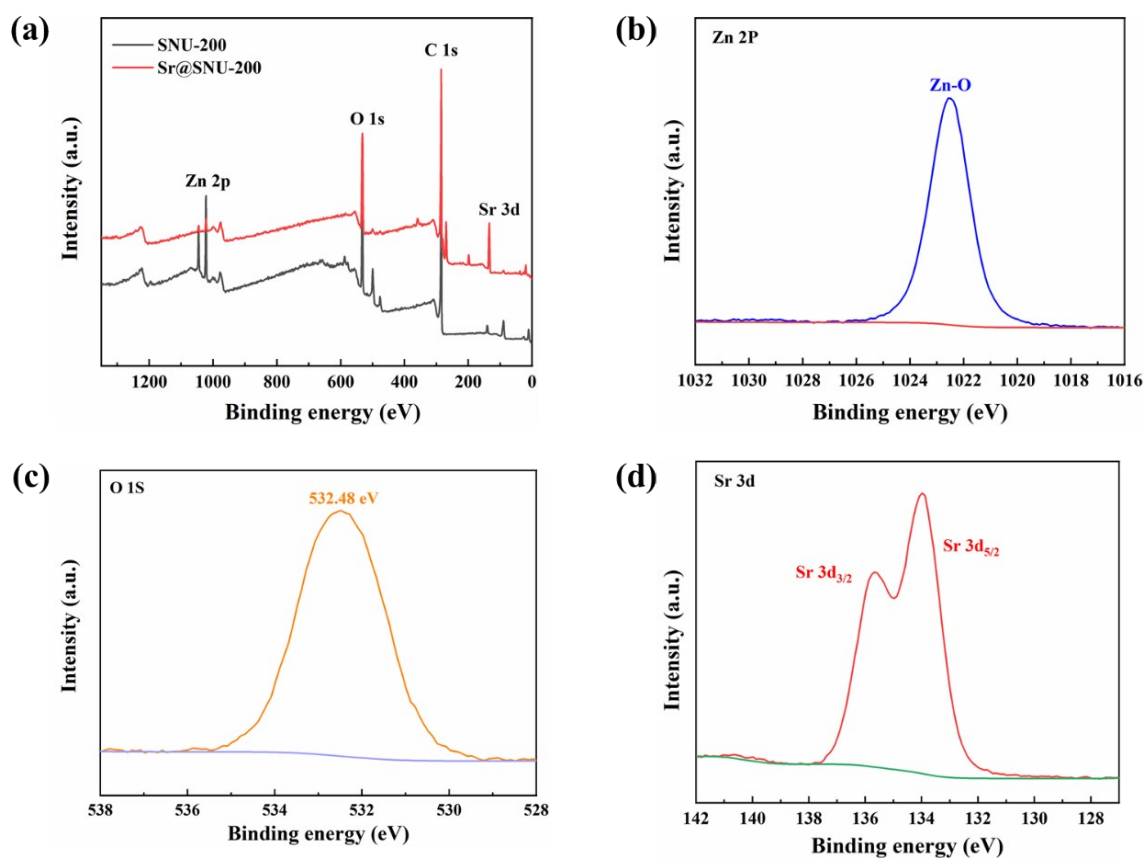

Fig. S10 (a) XPS spectrum of SNU-200 before and after adsorption of Sr<sup>2+</sup>. (b) Zn 2p XPS for SNU-200. (c) O 1s XPS for SNU-200. (d) Sr 3d XPS for Sr@SNU-200.
